# Supplementary material
Source: ML conference proceedings conference paper supplement (https://www.ecva.net/papers/eccv_2022/papers_ECCV/html/136720207_ECCV_2022_paper.php)
Supplement: Supplementary file 1 [file 136720207-supp.pdf]

# Bitwidth-Adaptive Quantization-Aware Neural Network Training: A Meta-Learning Approach - Appendix

July 20, 2022

## Why does combining meta-learning with QAT work?

Previous approaches (AdaBits/ApDNN) iteratively experience forward and backward propagations with varying bitwidth, which is similar to the inner-loop in MAML, leading to the intuition that combining the process with meta learning can enhance efficiency in a non-few-shot scenario and expand bitwidth-adaptive quantization to the few-shot scenario while also improving performance.

## More details on quantization.

We provide Table 6 including every dataset - model architecture pair of our experiments, corresponding bitwidth candidates and (fake) quantization method.

Table 6: Comparison of accuracy (%) between possible PN scheme designs.

| Experiment (Dataset, Model architecture)                     | Omniglot, 5-layer CNN<br>MiniImageNet, 5-layer CNN<br>Omniglot, 4-layer CNN<br>MiniImageNet, 4-layer CNN                                                                                                                                                                                                                                                                                                                                                                                                                                                                                                                                                  | CIFAR-10, MobileNet-v2        | CIFAR-10, Pre-activation ResNet-20<br>SVHN, 8-layer CNN                                                                                                                                                                                                                                                                                                                                                                                                                                                                                                                                                                                                                       |
|--------------------------------------------------------------|-----------------------------------------------------------------------------------------------------------------------------------------------------------------------------------------------------------------------------------------------------------------------------------------------------------------------------------------------------------------------------------------------------------------------------------------------------------------------------------------------------------------------------------------------------------------------------------------------------------------------------------------------------------|-------------------------------|-------------------------------------------------------------------------------------------------------------------------------------------------------------------------------------------------------------------------------------------------------------------------------------------------------------------------------------------------------------------------------------------------------------------------------------------------------------------------------------------------------------------------------------------------------------------------------------------------------------------------------------------------------------------------------|
| Bitwidth candidates in test<br>(except $b_w \neq b_a$ cases) | (2, 2), (2, 3), (2, 4), (2, 5), (2, 6), (2, 7), (2, 8), (2, 10), (2, FP),<br>(3, 2), (3, 3), (3, 4), (3, 5), (3, 6), (3, 7), (3, 8), (3, 10), (3, FP),<br>(4, 2), (4, 3), (4, 4), (4, 5), (4, 6), (4, 7), (4, 8), (4, 10), (4, FP),<br>(5, 2), (5, 3), (5, 4), (5, 5), (5, 6), (5, 7), (5, 8), (5, 10), (5, FP),<br>(6, 2), (6, 3), (6, 4), (6, 5), (6, 6), (6, 7), (6, 8), (6, 10), (6, FP),<br>(7, 2), (7, 3), (7, 4), (7, 5), (7, 6), (7, 7), (7, 8), (7, 10), (7, FP),<br>(8, 2), (8, 3), (8, 4), (8, 5), (8, 6), (8, 7), (8, 8), (8, 10), (8, FP),<br>(16, 2), (16, 3), (16, 4), (16, 5), (16, 6), (16, 7), (16, 8), (16, 10), (16, FP),<br>(FP, FP) |                               | (1, 1), (1, FP),<br>(2, 2), (2, 3), (2, 4), (2, 5), (2, 6), (2, 7), (2, 8), (2, 10), (2, FP),<br>(3, 2), (3, 3), (3, 4), (3, 5), (3, 6), (3, 7), (3, 8), (3, 10), (3, FP),<br>(4, 2), (4, 3), (4, 4), (4, 5), (4, 6), (4, 7), (4, 8), (4, 10), (4, FP),<br>(5, 2), (5, 3), (5, 4), (5, 5), (5, 6), (5, 7), (5, 8), (5, 10), (5, FP),<br>(6, 2), (6, 3), (6, 4), (6, 5), (6, 6), (6, 7), (6, 8), (6, 10), (6, FP),<br>(7, 2), (7, 3), (7, 4), (7, 5), (7, 6), (7, 7), (7, 8), (7, 10), (7, FP),<br>(8, 2), (8, 3), (8, 4), (8, 5), (8, 6), (8, 7), (8, 8), (8, 10), (8, FP),<br>(16, 2), (16, 3), (16, 4), (16, 5), (16, 6), (16, 7), (16, 8), (16, 10), (16, FP),<br>(FP, FP) |
| (Fake) quantization method                                   | Learned Step size Quantization (LSQ)                                                                                                                                                                                                                                                                                                                                                                                                                                                                                                                                                                                                                      | Scale-Adjusted Training (SAT) | DoReFa-Net                                                                                                                                                                                                                                                                                                                                                                                                                                                                                                                                                                                                                                                                    |

## Comparison with other possible scheme designs on PN framework.

Table 7: Comparison of accuracy (%) between possible PN scheme designs.

| Method                                                           | MiniImageNet 5-way 1-shot, 4-layer CNN |                         | MiniImageNet 5-way 5-shot, 4-layer CNN |                         |
|------------------------------------------------------------------|----------------------------------------|-------------------------|----------------------------------------|-------------------------|
|                                                                  | $(b_w, b_a) = (2, 2)$                  | $(b_w, b_a) = (FP, FP)$ | $(b_w, b_a) = (2, 2)$                  | $(b_w, b_a) = (FP, FP)$ |
| No inner-/outer-loop, jointly-varying update                     | 44.61                                  | 46.50                   | 59.51                                  | 65.52                   |
| Jointly-varying inner-loop                                       | 46.63                                  | 47.24                   | 64.75                                  | 66.17                   |
| MEBQAT-PN (bitwidth-varying inner-loop, data-varying outer-loop) | 47.66                                  | 48.33                   | 65.34                                  | 66.03                   |

Originally, in a bitwidth-class joint adaptation scenario, PN does not utilize the concept of inner-/outer-loops (as conventional training in a bitwidth adaptation scenario does). Thus, for MEBQAT-PN (third row of Table 7), we create a new inner loop with varying bitwidths (as we do for MEBQAT). Yet, the PN scheme design can be different such as PN model update with jointly-varying bitwidth and class (first row of Table 7) or creating a new jointly-varying inner loop (second row of Table 7). Table 7 shows that our MEBQAT-PN design achieves performance comparable to or outperforming the others.

### Experiments on more bitwidth settings.

Comparison of accuracy on more bitwidth settings where  $b_w \neq b_a$  is on Table 8. Our proposed scheme has performance comparable to or outperforming the compared schemes, even with a single model.

Table 8: Comparison of accuracy (%) on more bitwidth settings where  $b_w \neq b_a$ .

|             |                                        |                                        |
|-------------|----------------------------------------|----------------------------------------|
| Method      | CIFAR-10, Pre-activation ResNet-20     | SVHN, 8-layer CNN                      |
|             | $(b_w, b_a) = (7, 5)$                  | $(b_w, b_a) = (5, 16)$                 |
| QAT         | 92.66 ( $\pm 0.157$ )                  | 97.31 ( $\pm 0.077$ )                  |
| MEBQAT      | 92.82 ( $\pm 0.169$ )                  | 97.64 ( $\pm 0.051$ )                  |
| Method      | Omniglot 20-way 1-shot, 5-layer CNN    | Omniglot 20-way 5-shot, 5-layer CNN    |
|             | $(b_w, b_a) = (3, 8)$                  | $(b_w, b_a) = (16, FP)$                |
| FOMAML      | 78.60                                  | 97.47                                  |
| FOMAML+QAT  | 66.38                                  | 97.46                                  |
| MEBQAT-MAML | 91.86                                  | 97.88                                  |
| Method      | MiniImageNet 5-way 1-shot, 5-layer CNN | MiniImageNet 5-way 5-shot, 5-layer CNN |
|             | $(b_w, b_a) = (8, 2)$                  | $(b_w, b_a) = (2, 4)$                  |
| FOMAML      | 46.23                                  | 49.19                                  |
| FOMAML+QAT  | 48.61                                  | 60.87                                  |
| MEBQAT-MAML | 47.14                                  | 62.38                                  |
| Method      | Omniglot 20-way 1-shot, 4-layer CNN    | Omniglot 20-way 5-shot, 4-layer CNN    |
|             | $(b_w, b_a) = (2, 8)$                  | $(b_w, b_a) = (8, 3)$                  |
| PN          | 53.15                                  | 98.57                                  |
| PN+QAT      | 95.73                                  | 98.81                                  |
| MEBQAT-PN   | 95.12                                  | 98.57                                  |
| Method      | MiniImageNet 5-way 1-shot, 4-layer CNN | MiniImageNet 5-way 5-shot, 4-layer CNN |
|             | $(b_w, b_a) = (8, FP)$                 | $(b_w, b_a) = (2, 3)$                  |
| PN          | 49.47                                  | 31.07                                  |
| PN+QAT      | 50.01                                  | 66.80                                  |
| MEBQAT-PN   | 49.68                                  | 65.60                                  |

### Adaptation & inference phase.

Figure 3 illustrates the adaptation-and-inference phase in MEBQAT, MEBQAT-MAML, and MEBQAT-PN.

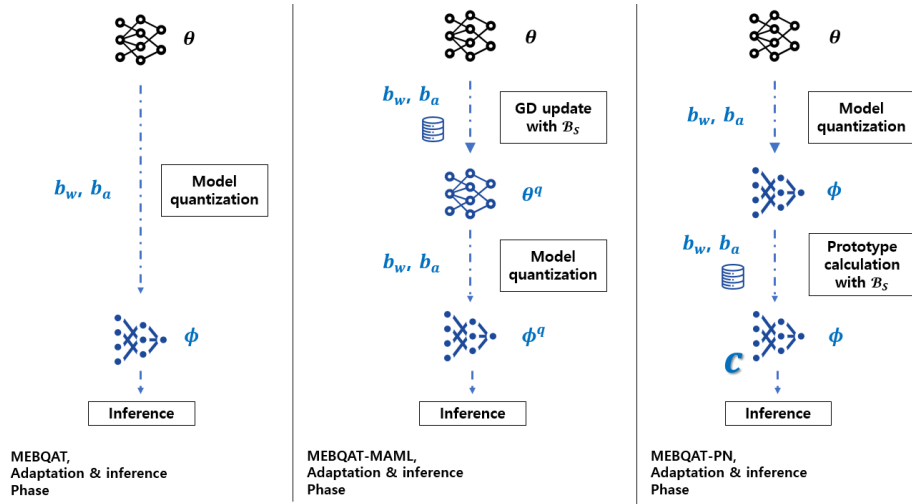

Figure 3: Illustration of adaptation-and-inference phase in MEBQAT, MEBQAT-MAML, and MEBQAT-PN. GD stands for Gradient Descent.  $\mathbf{c}$  denotes prototypes.  $\mathcal{B}_S$  represents a support set.
